# Supplementary material for: Enhanced mechanical properties of photo-clickable thiol–ene PEG hydrogels through repeated photopolymerization of in-swollen macromer
Source: Royal Society of Chemistry journal article supplement (doi:10.1039/c6sm01768a), 2016-01-01
Supplement: c6sm01768a1.pdf [file c6sm01768a1.pdf]

## Soft Matter

### Electronic Supplementary Information

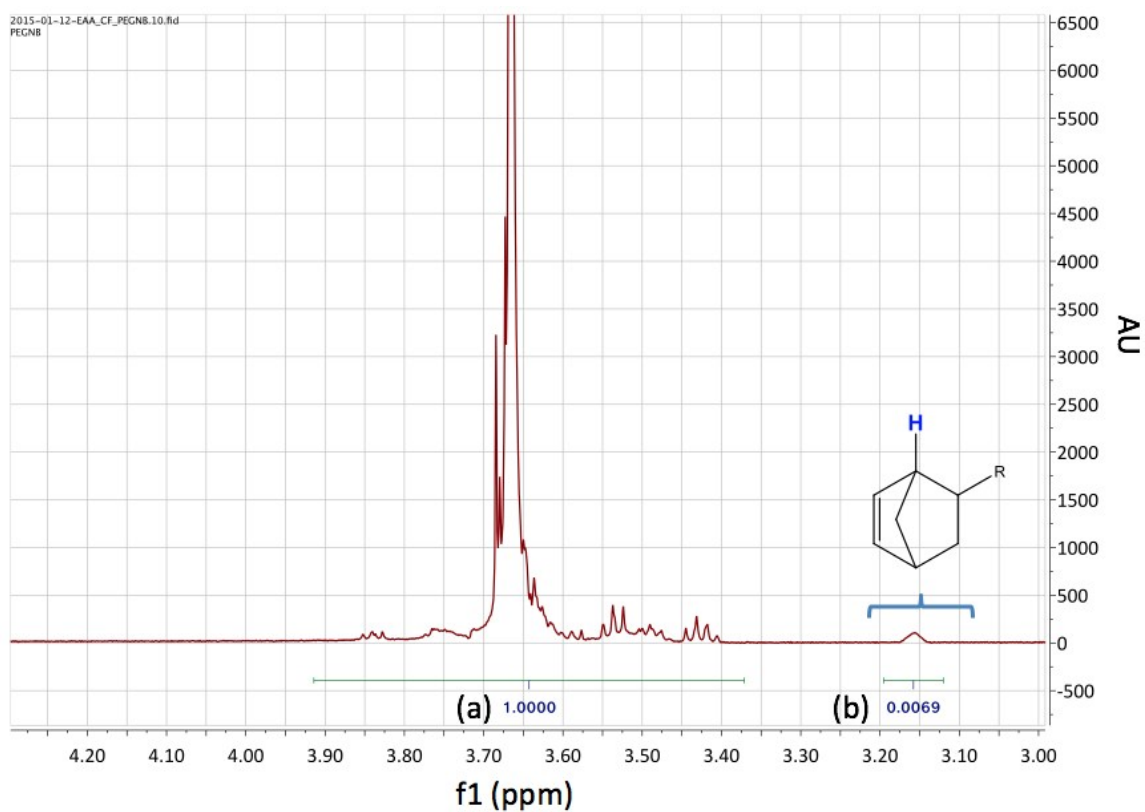

**ESI 1** Nuclear magnetic resonance spectrum of the conjugation product of norbornene (NB) to poly(ethylene glycol) amine (PEG), where (a) indicates the spectrum of the PEG backbone with resonance between  $\sim 3.4$ - $3.85$  ppm and (b) indicates the spectrum for the allylic proton closest to the NB bridged cyclic hydrocarbon group with resonance between  $\sim 3.1$ - $3.2$  ppm. A 99% conjugation percentage was found using the ratio of the two peak areas combined with the molecular weight of the PEG and NB molecules.

## Soft Matter

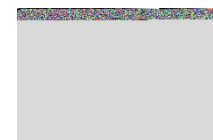

## Electronic Supplementary Information

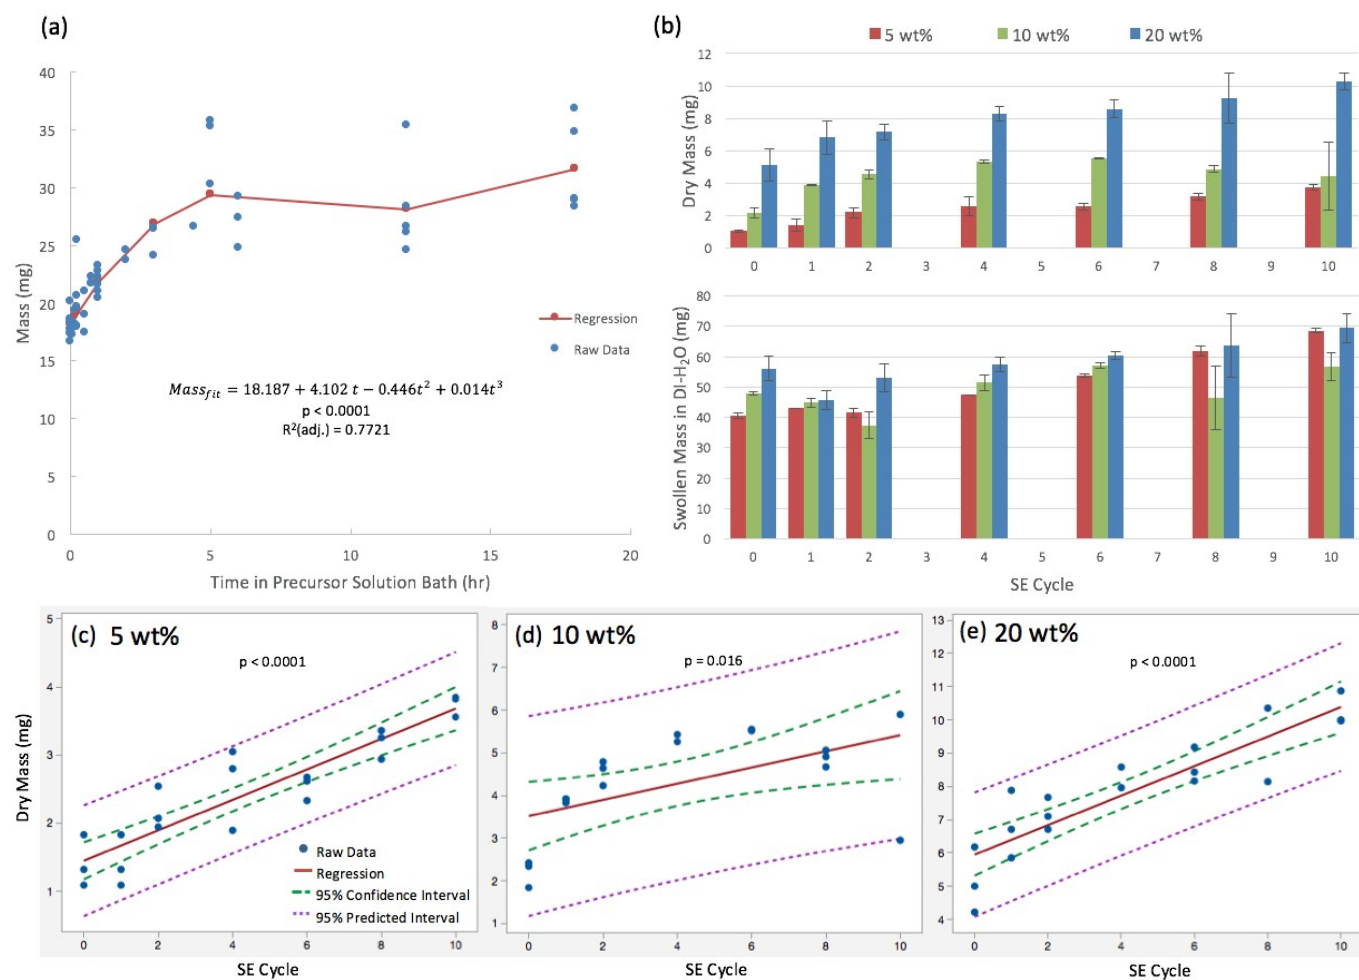

**ESI 2** (a) Swollen mass as a function of time in precursor solution bath and the polynomial regression analysis, shown as solid line in red ( $p < 0.0001$ ) (b) Bar graphs illustrating increased dry and swollen masses as a function of SE cycle with standard deviation indicated. (c-d) Regression fits with 95% confidence interval, demonstrating statistically significant increase in dry polymer mass as a function of SE cycle.

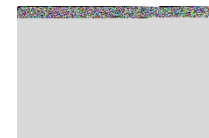

## Electronic Supplementary Information

|                                          | Best-fit Polynomial Regression Analysis                             |         |                       |
|------------------------------------------|---------------------------------------------------------------------|---------|-----------------------|
|                                          | Fit Equation                                                        | p-value | R <sup>2</sup> (adj.) |
| <b>5 wt%</b>                             |                                                                     |         |                       |
| Compressive Modulus ( $E$ )              | $E_{fit} = -2.8 + 36.0 SE - 6.3 SE^2 + 0.3 SE^3$                    | <0.0001 | 0.768                 |
| Toughness ( $T$ )                        | $\ln(T)_{fit} = 1.11 + 1.88 SE - 0.38 SE^2 + 0.02 SE^3$             | 0.0092  | 0.670                 |
| Volume Swelling Ratio ( $Q$ )            | $Q_{fit} = 40.6 - 13.3 SE + 2.5 SE^2 - 0.1 SE^3$                    | <0.0001 | 0.811                 |
| Crosslink Density ( $\rho_x$ )           | $\rho_{xfit} = -0.000526 + 0.0101 SE - 0.00172 SE^2 + 0.00009 SE^3$ | 0.0198  | 0.896                 |
| Linear Deformation ( $\lambda$ )         | $\lambda_{fit} = 1.289 - 0.015 SE - 0.0016 SE^2 + 0.0002 SE^3$      | <0.0001 | 0.864                 |
| Linear Deformation Ratio ( $\lambda_n$ ) | $\lambda_{nfit} = 3.435 - 0.443 SE - 0.082 SE^2 + 0.005 SE^3$       | <0.0001 | 0.790                 |
| <b>10 wt%</b>                            |                                                                     |         |                       |
| Compressive Modulus ( $E$ )              | $\ln(E)_{fit} = 3.00 + 1.22 SE - 0.21 SE^2 + 0.01 SE^3$             | <0.0001 | 0.931                 |
| Toughness ( $T$ )                        | $T_{fit} = 9.4 + 38.1 SE - 8.0 SE^2 + 0.5 SE^3$                     | <0.0001 | 0.759                 |
| Volume Swelling Ratio ( $Q$ )            | $Q_{fit} = 21.2 - 8.4 SE + 1.5 SE^2 - 0.1 SE^3$                     | 0.0006  | 0.636                 |
| Crosslink Density ( $\rho_x$ )           | $\rho_{xfit} = 0.00436 + 0.0148 SE - 0.00208 SE^2 + 0.00009 SE^3$   | 0.0018  | 0.980                 |
| Linear Deformation ( $\lambda$ )         | $\lambda_{fit} = 2.868 - 0.712 SE + 0.129 SE^2 + 0.006 SE^3$        | 0.042   | 0.300                 |
| Linear Deformation Ratio ( $\lambda_n$ ) | $\lambda_{nfit} = 1.351 - 0.072 SE + 0.008 SE^2 - 0.006 SE^3$       | <0.0001 | 0.864                 |
| <b>20 wt%</b>                            |                                                                     |         |                       |
| Compressive Modulus ( $E$ )              | $E_{fit} = 107 + 152 SE - 30 SE^2 + 2 SE^3$                         | <0.0001 | 0.695                 |
| Toughness ( $T$ )                        | $\ln(T)_{fit} = 3.41 + 0.88 SE - 0.17 SE^2 + 0.01 SE^3$             | <0.0001 | 0.695                 |
| Volume Swelling Ratio ( $Q$ )            | $Q_{fit} = 10.9 - 2.79 SE + 0.56 SE^2 - 0.03 SE^3$                  | 0.0011  | 0.628                 |
| Crosslink Density ( $\rho_x$ )           | $\rho_{xfit} = 0.0242 + 0.0277 SE - 0.0051 SE^2 + 0.0003 SE^3$      | 0.0302  | 0.862                 |
| Linear Deformation ( $\lambda$ )         | $\lambda_{fit} = 2.207 - 0.209 SE + 0.042 SE^2 - 0.002 SE^3$        | 0.0018  | 0.600                 |
| Linear Deformation Ratio ( $\lambda_n$ ) | $\lambda_{nfit} = 1.408 - 0.081 SE - 0.0134 SE^2 - 0.0007 SE^3$     | 0.0167  | 0.425                 |

**ESI 3** Polynomial regression analysis for all initial precursor formulations and hydrogel properties as functions of SE cycle are reported here along with their respective p and R<sup>2</sup>(adjusted) values. For all models, we compared with linear and quadratic terms only models and for each response variable, a linear-quadratic-cubic model was most appropriate.

## Soft Matter

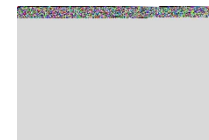

## Electronic Supplementary Information

| Precursor Solution Concentration | Bath with photoinitiator | Bath without photoinitiator | Compressive Modulus (kPa) | Volume Swelling Ratio (Q) |
|----------------------------------|--------------------------|-----------------------------|---------------------------|---------------------------|
| 5 wt%                            | X                        |                             | 6.9 ± 0.1                 | 19.4 ± 2.0                |
|                                  |                          | X                           | 6.7 ± 0.4                 | 20.5 ± 1.0                |
| 10 wt%                           | X                        |                             | 18.8 ± 1.8                | 14.5 ± 3.4                |
|                                  |                          | X                           | 18.1 ± 2.4                | 15.6 ± 1.6                |
| 20 wt%                           | X                        |                             | 50.6 ± 3.1                | 12.1 ± 0.4                |
|                                  |                          | X                           | 49.8 ± 1.3                | 11.6 ± 1.2                |

**ESI 4** Mechanical properties are not influenced by the presence of photoinitiator. In a two-way ANOVA the main effect of wt% was significant ( $p < 0.0001$ ). However, there was no significant main effect of photoinitiator status, and no significant interaction between wt% and photoinitiator status.

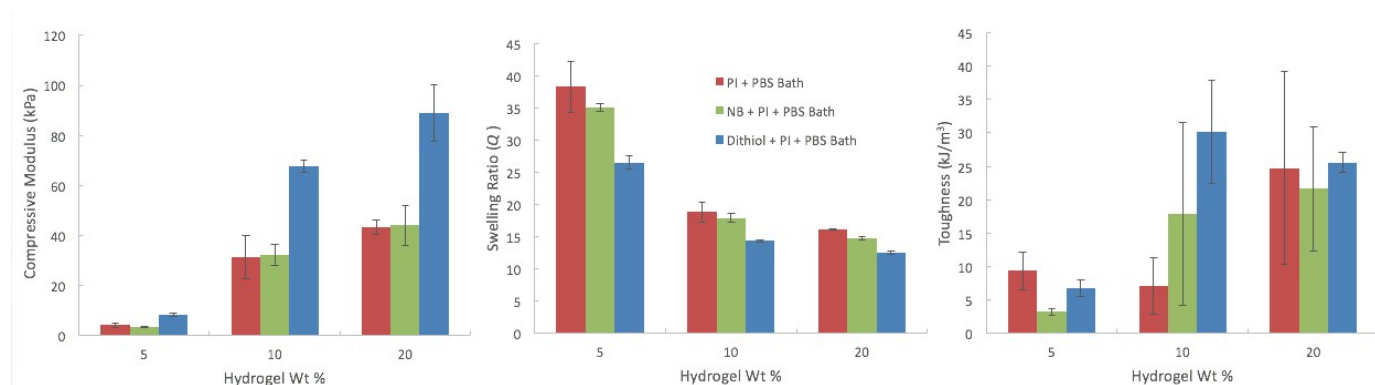

**ESI 5** Mechanical properties of hydrogels after a single swelling and exposure cycle using precursor solution containing solely (red) photoinitiator and PBS; (green) PEG-NB, photoinitiator, and PBS; or (blue) PEG-dithiol, photoinitiator. The compressive modulus was unaffected by the presence of solely PEG-NB in the solution, while it doubled when the PEG-dithiol solution was in-swelled and polymerized ( $p < 0.0001$ ). For both PEG-NB and PEG-dithiol solution, the swelling ratio decreased with respect to the photoinitiator solution control ( $p < 0.05$ ). Hydrogel toughness was not uniformly affected by the presence of either solely PEG-NB or PEG-dithiol across the three formulations ( $p > 0.05$ ).
